# Supplementary material
Source: publisher figshare collection journal article supplement (https://tandf.figshare.com/ndownloader/files/18516899)
Supplement: Supplementary file 1 [file 18516899]

## ***Supplementary Materials***

### **Recoverable impacts of ocean acidification on the tubeworm, *Hydroides elegans*: implication for biofouling in future coastal oceans**

Yuan Meng<sup>a</sup>, Chaoyi Li<sup>a</sup>, Hangkong Li<sup>b</sup>, Kaimin Shih<sup>b</sup>, Chong He<sup>c</sup>, Haimin Yao<sup>c</sup>  
and V. Thiagarajan<sup>a,d\*</sup>

*<sup>a</sup>The Swire Institute of Marine Science and School of Biological Sciences, <sup>b</sup>Department of Civil Engineering, The University of Hong Kong, Hong Kong SAR, China; <sup>c</sup>Department of Mechanical Engineering, The Hong Kong Polytechnic University, Hong Kong SAR, China; <sup>d</sup>State Key Laboratory for Marine Pollution, Hong Kong SAR, China*

\*Corresponding author (V. Thiagarajan: [rajan@hku.hk](mailto:rajan@hku.hk))

**Table S1.** Measured and calculated values (mean  $\pm$  SD;  $n = 4$ ) of carbonate system parameters in culture tanks. Parameter abbreviations:  $p\text{CO}_2$ : partial pressure of carbon dioxide;  $\text{CO}_3^{2-}$ : carbonate ion concentration;  $\Omega_{\text{aragonite}}$ : aragonite saturation state;  $\Omega_{\text{calcite}}$ : calcite saturation state and TA: total alkalinity. Treatment abbreviations: C: pH 8.1 in stage 1; T: pH 7.8 in stage 1; CC: pH 8.1 in stage 1 and stage 2; CT: pH 8.1 in stage 1 and pH 7.8 in stage 2; TC: pH 7.8 in stage 1 and pH 8.1 in stage 2; TT: pH 7.8 in stage 1 and stage 2. 2 main stages in the experimental design: stage 1: 0-30 days (“0” denotes the time when the worms settled) and stage 2: 30-60 days.

| Measured parameters |         |                 |                |                                    | Calculated parameters            |                                    |                                                |                           |                             |
|---------------------|---------|-----------------|----------------|------------------------------------|----------------------------------|------------------------------------|------------------------------------------------|---------------------------|-----------------------------|
| Stage 1             | Stage 2 | pH              | Salinity (psu) | Temperature ( $^{\circ}\text{C}$ ) | TA ( $\mu\text{equiv kg}^{-1}$ ) | $p\text{CO}_2$ ( $\mu\text{atm}$ ) | $\text{CO}_3^{2-}$ ( $\mu\text{mol kg}^{-1}$ ) | $\Omega_{\text{calcite}}$ | $\Omega_{\text{aragonite}}$ |
| C                   | CC/TC   | 8.09 $\pm$ 0.01 | 34.0 $\pm$ 0.1 | 22.5 $\pm$ 0.1                     | 2128 $\pm$ 101                   | 478 $\pm$ 31                       | 153.3 $\pm$ 4                                  | 3.71 $\pm$ 0.11           | 2.42 $\pm$ 0.07             |
| T                   | CT/TT   | 7.80 $\pm$ 0.01 | 34.0 $\pm$ 0.1 | 22.5 $\pm$ 0.1                     | 2152 $\pm$ 92                    | 1012 $\pm$ 41                      | 86.3 $\pm$ 4                                   | 2.09 $\pm$ 0.10           | 1.36 $\pm$ 0.07             |

**Table S2.** Summary of the comparison on tube length, C/A ratio and density of stage 1 sections between CC and CT, and between TC and TT by using (a) student's t test and (b) Mann-Whitney U Test.

**a. T-test Statistics**

|                  | <b>t</b> | <b>df</b> | <b><i>p</i></b> |
|------------------|----------|-----------|-----------------|
| <b>Length</b>    |          |           |                 |
| CC vs CT         | 0.44     | 6         | 0.67            |
| TT vs TC         | 0.29     | 6         | 0.77            |
| <b>C/A ratio</b> |          |           |                 |
| CC vs CT         | 1.81     | 5         | 0.07            |
| TT vs TC         | -1.02    | 5         | 0.18            |
| <b>Density</b>   |          |           |                 |
| CC vs CT         | -1.12    | 11        | 0.14            |

**b. Mann-Whitney U Test**

|                |                 |
|----------------|-----------------|
| <b>Density</b> |                 |
| TT vs TC       | <i>p</i> = 0.27 |

**Table S3** Regression analyses of mechanical patterns (normalized hardness and stiffness) along the normalized length of the tubes from the CC, CT, TC and TT groups.

|           | Best-fit Regression                                        |             |          |                | Response           |
|-----------|------------------------------------------------------------|-------------|----------|----------------|--------------------|
|           | Regression                                                 | Type        | <i>p</i> | R <sup>2</sup> |                    |
| Hardness  |                                                            |             |          |                |                    |
| CC        | y = 0.88x + 0.55                                           | Linear      | < 0.001  | 0.64           | Positive           |
| CT        | No significant trend (p>0.05)                              | None        | n/a      | n/a            | Neutral            |
| TC        | y = 11.11x <sup>3</sup> - 9.65x <sup>2</sup> + 2.69x+ 0.13 | Exponential | < 0.001  | 0.65           | Threshold-positive |
| TT        | y = 1.94x+ 0.03                                            | Linear      | < 0.001  | 0.45           | Positive           |
| Stiffness |                                                            |             |          |                |                    |
| CC        | y = x+ 0.50                                                | Linear      | < 0.001  | 0.58           | Positive           |
| CT        | No significant trend (p>0.05)                              | None        | n/a      | n/a            | Neutral            |
| TC        | y = 8.85x <sup>3</sup> - 6.75x <sup>2</sup> + 1.39x+ 0.37  | Exponential | < 0.001  | 0.60           | Threshold-positive |
| TT        | y = 2.12x- 0.06                                            | Linear      | < 0.001  | 0.38           | Positive           |
